# Supplementary material
Source: HighWire-hosted journal article supplement (https://dmd.aspetjournals.org/highwire/filestream/79668/field_highwire_adjunct_files/0/993_supp_data.pdf)
Supplement: 993_supp_data.pdf [file 993_supp_data.pdf]

**Supplementary information to**

**DMD-AR-2022-000993 entitled "Activity and expression of carboxylesterases and arylacetamide deacetylase in human ocular tissues"**

**Anam Hammid<sup>1\*</sup>, John K. Fallon<sup>2</sup>, Toni Lassila<sup>3</sup>, Paula Vieiro<sup>4</sup>, Anusha Balla<sup>1</sup>,  
Francisco Gonzalez<sup>5,6</sup>, Arto Urtti<sup>1,7</sup>, Philip C. Smith<sup>2</sup>, Ari Tolonen<sup>3</sup>, Paavo Honkakoski<sup>1\*</sup>**

<sup>1</sup>School of Pharmacy, University of Eastern Finland, Yliopistonranta 1 C, 70210 Kuopio, Finland

<sup>2</sup>Division of Pharmacoengineering and Molecular Pharmaceutics, Eshelman School of Pharmacy, University of North Carolina at Chapel Hill, Campus Box 7355, Chapel Hill, North Carolina 27599-7355, United States

<sup>3</sup>Admescope Ltd, Typpitie 1, 90620 Oulu, Finland

<sup>4</sup>Biobank at the University Hospital at Santiago de Compostela (CHUS), 15706 Santiago de Compostela, Spain

<sup>5</sup>Center for Research in Molecular Medicine and Chronic Diseases (CIMUS), University of Santiago de Compostela, 15782 Santiago de Compostela, Spain

<sup>6</sup>Service of Ophthalmology, University Hospital of Santiago de Compostela, and Fundacion Instituto de Investigacion Sanitaria de Santiago de Compostela (FIDIS), 15706 Santiago de Compostela

<sup>7</sup>Faculty of Pharmacy, University of Helsinki, Viikinkaari 5 E, 00790 Helsinki, Finland

\*Corresponding Author: [anam.hammid@uef.fi](mailto:anam.hammid@uef.fi), [paavo.honkakoski@uef.fi](mailto:paavo.honkakoski@uef.fi) Yliopistonranta 1, Kuopio, FI 70211, tel. +358 465354577 (A.H.), +358403552490 (P.H.)

## CONTENTS

**Supplementary Table 1.** Details of samples obtained from postmortem donors.

**Supplementary Table 2.** Details of samples obtained from patient donors.

**Supplementary Table 3.** MRM parameters for the analysis of CESs and AADAC peptides

**Supplementary Table 4.** Correlation between hydrolytic activities and CES1 content

**Supplementary Figure 1.** Western blotting of human ocular samples with the anti-CES2 antibody

**Supplementary Figure 2.** Western blotting of human vitreous, retina, and RPE/choroid samples with the anti-BDNF and anti-bestrophin-1 antibodies

**Supplementary Figure 3.** Correlation between CES1 content and hydrolysis activities of the three human ocular tissue pools

**Supplementary Table 1.** Details of samples obtained from postmortem donors.

| <b>DONOR</b> | <b>SEX/AGE<sup>A</sup></b> | <b>EYE/TISSUE<sup>B</sup></b>                            | <b>CAUSE OF DEATH</b> | <b>REMARKS</b>                                                 |
|--------------|----------------------------|----------------------------------------------------------|-----------------------|----------------------------------------------------------------|
| <b>B1</b>    | M 63                       | LE conjunctiva<br>RE conjunctiva                         | Brain injury          | --                                                             |
| <b>B2</b>    | M 54                       | LE conjunctiva<br>RE conjunctiva                         | Cardiac arrest        | Rosacea                                                        |
| <b>B3</b>    | F 76                       | RE conjunctiva                                           | Brain stroke          | Diabetic                                                       |
| <b>B4</b>    | F 82                       | RE conjunctiva<br>RE globe<br>LE globe                   | Brain stroke          | RE cataract surgery<br>RE w/o cornea<br>LE w/o cornea          |
| <b>B5</b>    | M 52                       | RE conjunctiva<br>RE globe<br>LE globe                   | Brain injury          | RE w/o cornea<br>LE w/o cornea                                 |
| <b>B6</b>    | M 64                       | RE conjunctiva<br>RE globe                               | Cardiac arrest        | RE w/o cornea                                                  |
| <b>B7</b>    | M 64                       | RE conjunctiva<br>LE conjunctiva<br>RE globe<br>LE globe | Choking               | RE w/o cornea<br>LE w/o cornea                                 |
| <b>B8</b>    | M 64                       | RE conjunctiva<br>LE conjunctiva<br>RE globe<br>LE globe | Cardiac arrest        | RE w/o cornea<br>LE w/o cornea                                 |
| <b>B9</b>    | M 74                       | RE conjunctiva<br>LE conjunctiva<br>RE globe             | Brain hemorrhage      | Diabetic retinopathy<br>RE cataract surgery<br>RE vitrectomy   |
| <b>B10</b>   | F 73                       | RE conjunctiva<br>LE conjunctiva<br>RE globe<br>LE globe | Brain stroke          | RE w/o cornea<br>LE w/o cornea                                 |
| <b>B 11</b>  | M 74                       | RE conjunctiva<br>LE conjunctiva<br>RE globe<br>LE globe | Cardiac arrest        | RE w/o cornea<br>LE w/o cornea                                 |
| <b>B 12</b>  | F 68                       | RE conjunctiva<br>RE globe<br>LE globe                   | Brain stroke          | RE w/o cornea<br>LE w/o cornea                                 |
| <b>B13</b>   | M 83                       | RE conjunctiva                                           | Brain stroke          | --                                                             |
| <b>B14</b>   | M 68                       | RE conjunctiva<br>LE conjunctiva                         | Brain stroke          | RE: conjunctival degeneration<br>LE: conjunctival degeneration |

<sup>A</sup>, F/M, female/male; age in years

<sup>B</sup>, LE = left eye, RE = right eye; LE/RE globe = the entire eye globe was removed

**Supplementary Table 2.** Details of samples obtained from patient donors.

| <b>DONOR</b> | <b>SEX/AGE<sup>A</sup></b> | <b>EYE/TISSUE<sup>B</sup></b>         | <b>CAUSE OF EVISCERATION</b>   | <b>REMARKS</b>             |
|--------------|----------------------------|---------------------------------------|--------------------------------|----------------------------|
| <b>A1</b>    | F 85                       | LE Cornea                             | Terminal glaucoma              | --                         |
| <b>A2</b>    | M 62                       | LE Cornea                             | Terminal glaucoma              | --                         |
| <b>A3</b>    | F 16                       | RE Cornea                             | Phthisis                       | --                         |
| <b>A4</b>    | M 79                       | RE Vitreous                           | Terminal glaucoma              | --                         |
| <b>A5</b>    | M 72                       | LE Cornea<br>LE Retina                | Painful blind eye              | Diabetic retinopathy       |
| <b>A6</b>    | F 85                       | LE Cornea<br>LE Vitreous              | Terminal glaucoma              | --                         |
| <b>A7</b>    | F 86                       | RE Cornea<br>RE Vitreous<br>RE Retina | Painful blind eye              | Corneal neovascularization |
| <b>A8</b>    | F 79                       | RE Cornea<br>RE Retina                | Painful blind eye,<br>phthisis | --                         |
| <b>A9</b>    | F 88                       | RE Vitreous<br>RE Retina              | Terminal glaucoma              | --                         |

<sup>A</sup>, F/M, female/male; age in years

<sup>B</sup>, LE = left eye, RE = right eye

**Supplementary Table 3.** MRM parameters used for the analysis of CESs and AADAC selected peptides are shown. Labeled and unlabeled MRMs, three in total are presented while for the concentration (peak area ratio) determination, only the two giving the highest signals were used.

| <i>Enzyme</i>                              | <i>Peptide sequence</i>        | <i>CE (V)</i> | <i>Hydrophobicity from SSRCalc</i> | <i>RT (min)</i> | <i>Precursor ion (m/z)</i> | <i>Product ion (m/z) (y or b)</i>                       |
|--------------------------------------------|--------------------------------|---------------|------------------------------------|-----------------|----------------------------|---------------------------------------------------------|
| <b>Na<sup>+</sup>/K<sup>+</sup> ATPase</b> | AAVPDAVGK<br>(light)           | 18.8          | 10.62                              | 9.1             | 414.23                     | 586.32 (y6)                                             |
|                                            |                                | 15.8          |                                    |                 | 414.23                     | 242.15 (b3)                                             |
|                                            |                                | 22.8          |                                    |                 | 414.23                     | 293.66 (y6+2)                                           |
|                                            | AAVPDAVGK<br>(heavy)           | 18.8          |                                    |                 | 418.25                     | 594.34 (y6)                                             |
|                                            |                                | 15.8          |                                    |                 | 418.25                     | 242.15 (b3)                                             |
|                                            |                                | 22.8          |                                    |                 | 418.25                     | 297.68 (y6+2)                                           |
| <b>CES1</b>                                | FWANFAR<br>(light)             | 23.3          | 27.42                              | 14.9            | 456.23                     | 578.30 (y5)                                             |
|                                            |                                | 23.3          |                                    |                 | 456.23                     | 507.27 (y4)                                             |
|                                            |                                | 24.3          |                                    |                 | 456.23                     | 764.38 (y6)                                             |
|                                            | FWANFAR<br>(heavy)             | 23.3          |                                    |                 | 461.23                     | 588.31 (y5)                                             |
|                                            |                                | 23.3          |                                    |                 | 461.23                     | 517.28 (y4)                                             |
|                                            |                                | 24.3          |                                    |                 | 461.23                     | 774.39 (y6)                                             |
| <b>CES2</b>                                | ADHGDELPFVFR<br>(light)        | 17.1          | 31.09                              | 16.6            | 468.23                     | 333.19 (y5+2)                                           |
|                                            |                                | 18.1          |                                    |                 | 468.23                     | 738.31 (b7)                                             |
|                                            |                                | 22.1          |                                    |                 | 468.23                     | 665.38 (y5)                                             |
|                                            | ADHGDELPFVFR<br>(heavy)        | 17.1          |                                    |                 | 471.57                     | 338.20 (y5+2)                                           |
|                                            |                                | 18.1          |                                    |                 | 471.57                     | 738.31 (b7)                                             |
|                                            |                                | 22.1          |                                    |                 | 471.57                     | 675.39 (y5)                                             |
| <b>CES2</b>                                | AGVHTFLGIPFA<br>K<br>(light)   | 19.2          | 36.1                               | 17.3            | 453.26                     | 462.27 (y4)                                             |
|                                            |                                | 19.2          |                                    |                 | 453.26                     | 231.64 (y4+2)                                           |
|                                            |                                | 19.2          |                                    |                 | 453.26                     | 783.41 (b8)                                             |
|                                            | AGVHTFLGIPFA<br>K<br>(heavy)   | 19.2          |                                    |                 | 455.93                     | 470.30 (y4)                                             |
|                                            |                                | 19.2          |                                    |                 | 455.93                     | 235.65 (y4+2)                                           |
|                                            |                                | 19.2          |                                    |                 | 455.93                     | 783.41 (b8)                                             |
| <b>CES3</b>                                | LAFPEATEEEK<br>(light)         | 19.5          | 20.58                              | 10.8            | 421.87                     | 575.77                                                  |
|                                            |                                | 24.5          |                                    |                 | 421.87                     | (y10+2)                                                 |
|                                            |                                | 28.5          |                                    |                 | 421.87                     | 559.26                                                  |
|                                            | LAFPEATEEEK<br>(heavy)         | 19.5          |                                    |                 | 424.55                     | (b10+2)                                                 |
|                                            |                                | 24.5          |                                    |                 | 424.55                     | 430.21 (b8+2)                                           |
|                                            |                                | 28.5          |                                    |                 | 424.55                     | 579.78<br>(y10+2)<br>559.26<br>(b10+2)<br>430.21 (b8+2) |
| <b>CES3</b>                                | NTIYPLTVDGTV<br>FPK<br>(light) | 37.8          | 36.04                              | 17.4            | 832.95                     | 1173.65 (y11)                                           |
|                                            |                                | 28.8          |                                    |                 | 832.95                     | 492.25 (b4)                                             |
|                                            |                                | 24.8          |                                    |                 | 555.63                     | 763.40 (y7)                                             |
|                                            |                                | 37.8          |                                    |                 | 836.96                     | 1181.68 (y11)                                           |

|              |                               |      |       |      |        |               |
|--------------|-------------------------------|------|-------|------|--------|---------------|
|              | NTIYPLTVDGTV                  | 28.8 |       |      | 836.96 | 492.25 (b4)   |
|              | FPK<br>(heavy)                | 24.8 |       |      | 558.31 | 771.42 (y7)   |
| <b>CES3</b>  | TPEEILAEK<br>(light)          | 27.4 | 17.74 | 11.6 | 515.28 | 464.75 (y8+2) |
|              |                               | 27.4 |       |      | 515.28 | 831.45 (y7)   |
|              |                               | 30.4 |       |      | 515.28 | 702.40 (y6)   |
|              | TPEEILAEK<br>(heavy)          | 27.4 |       |      | 519.29 | 468.77 (y8+2) |
|              |                               | 27.4 |       |      | 519.29 | 839.47 (y7)   |
|              |                               | 30.4 |       |      | 519.29 | 710.43 (y6)   |
| <b>CES3</b>  | FAPPQPAEPWNF<br>VK<br>(light) | 36.2 | 33.14 | 17.0 | 814.42 | 705.36        |
|              |                               | 21.1 |       |      | 543.28 | (y12+2)       |
|              |                               | 21.1 |       |      | 543.28 | 395.72 (y6+2) |
|              |                               | 36.2 |       |      | 818.43 | 790.42 (y6)   |
|              | FAPPQPAEPWNF<br>VK<br>(heavy) | 21.1 |       |      | 545.96 | 709.38        |
|              |                               | 21.1 |       |      | 545.96 | (y12+2)       |
|              |                               |      |       |      |        | 399.73 (y6+2) |
|              |                               |      |       |      |        | 798.45 (y6)   |
| <b>AADAC</b> | FWSEYFTTDR<br>(light)         | 30.2 | 32.45 | 16.2 | 676.30 | 1018.45 (y8)  |
|              |                               | 30.2 |       |      | 676.30 | 802.37 (y6)   |
|              |                               | 32.2 |       |      | 676.30 | 931.42 (y7)   |
|              | FWSEYFTTDR<br>(heavy)         | 30.2 |       |      | 681.31 | 1028.46 (y8)  |
|              |                               | 30.2 |       |      | 681.31 | 812.38 (y6)   |
|              |                               | 32.2 |       |      | 681.31 | 941.42 (y7)   |
| <b>AADAC</b> | YPGFLDVR<br>(light)           | 24.3 | 28.07 | 15.5 | 483.76 | 402.22 (y7+2) |
|              |                               | 27.3 |       |      | 483.76 | 706.34 (y6)   |
|              |                               | 20.3 |       |      | 483.76 | 693.32 (b6)   |
|              | YPGFLDVR<br>(heavy)           | 24.3 |       |      | 488.76 | 407.23 (y7+2) |
|              |                               | 27.3 |       |      | 488.76 | 716.40 (y6)   |
|              |                               | 20.3 |       |      | 488.76 | 693.32 (b6)   |
| <b>AADAC</b> | TPTPGSLELAQK<br>(light)       | 32.2 | 21.72 | 12.1 | 621.34 | 942.53 (y9)   |
|              |                               | 34.2 |       |      | 621.34 | 471.77 (y9+2) |
|              |                               | 33.2 |       |      | 621.34 | 300.16 (b3)   |
|              | TPTPGSLELAQK<br>(heavy)       | 32.2 |       |      | 625.35 | 950.55 (y9)   |
|              |                               | 34.2 |       |      | 625.35 | 475.78 (y9+2) |
|              |                               | 33.2 |       |      | 625.35 | 300.17 (b3)   |

\*CE, collision energy; RT, retention time

**Supplementary Table 4.** Correlation between the hydrolytic activities and CES1 content.

| <b>Activities</b> | <b>NPA</b> | <b>DME</b> | <b>FDA</b> | <b>Procaine</b> | <b>CES1</b> |
|-------------------|------------|------------|------------|-----------------|-------------|
| <b>NPA</b>        | 1          |            |            |                 |             |
| <b>DME</b>        | 0.05       | 1          |            |                 |             |
| <b>FDA</b>        | 0.21       | 0.73       | 1          |                 |             |
| <b>Procaine</b>   | 0.06       | 0.75       | 0.8        | 1               |             |
| <b>CES1</b>       | 0.06       | 0.48       | 0.41       | 0.13            | 1           |

Pearson correlation coefficients ( $r^2$ ) are shown.

**Supplementary Figure 1.** Western blotting of human ocular samples with the anti-CES2 antibody

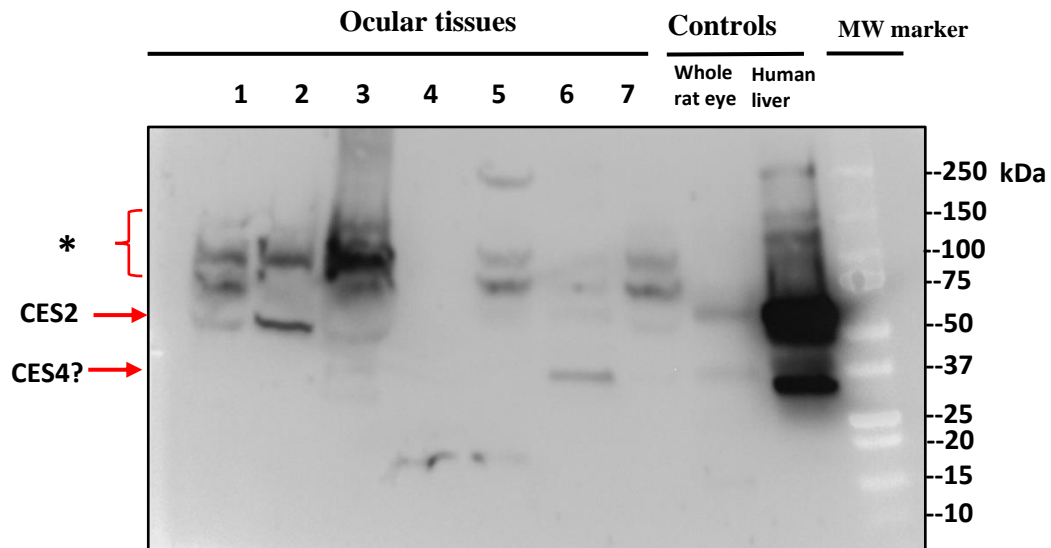

**Figure S1.** Western blot image of ocular tissues with the anti-CES2 antibody. Protein samples (40  $\mu$ g) were loaded on lanes as follows: 1 = conjunctiva, 2 = cornea, 3 = vitreous, 4 = lens, 5 = iris-ciliary body, 6 = retina, and 7 = RPE/choroid, followed by positive control samples and the MW marker. The relative migration of the sample and the MW marker bands were calculated using ImageJ (Abràmoff et al., 2004). Estimation of the protein sizes was done from a linear line of log MW versus distance migrated. Arrows indicate the position of CES2 and tentatively identified CES4/CES1P1 and the bracket shows the larger immunoreactive bands (\*), putatively due to non-specific binding.



**Supplementary Figure 2.** Western blotting of human vitreous, retina and RPE/choroid samples with the anti-BDNF (A) and anti-bestrophin-1 antibodies (B)

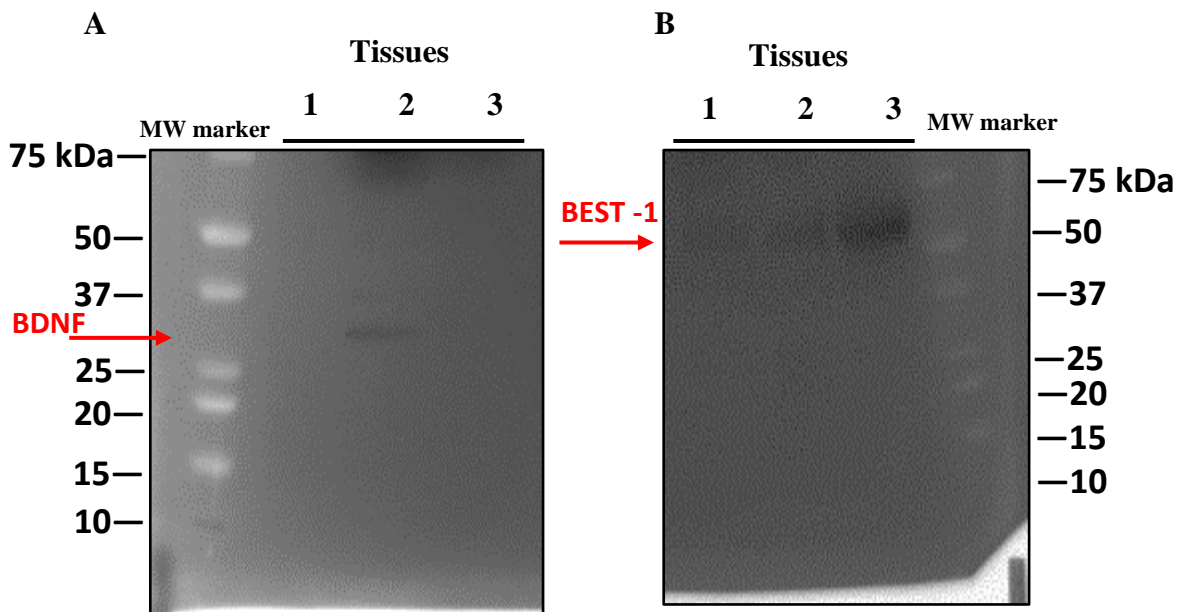

**Figure S2.** Western blot image of ocular tissues with anti-BDNF (panel A) and anti-bestrophin-1 (panel B) antibodies. Protein samples (20  $\mu$ g) were loaded on as follows: 1 = vitreous, 2 = retina, and 3 = RPE/choroid, and the MW marker. The relative migration of the sample and the MW marker bands were calculated using ImageJ (Abràmoff et al., 2004). Estimation of the protein sizes was done from a linear line of log MW versus distance migrated. Arrows indicate the positions of BDNF and bestrophin-1.

### Reference

Abràmoff MD, Magalhães, PJ and Ram, SJ (2004) Image processing with ImageJ. *Biophotonics International* **11**: 36-42

**Supplementary Figure 3.** Correlation between CES1 content and hydrolysis activities of the three human ocular tissue pools

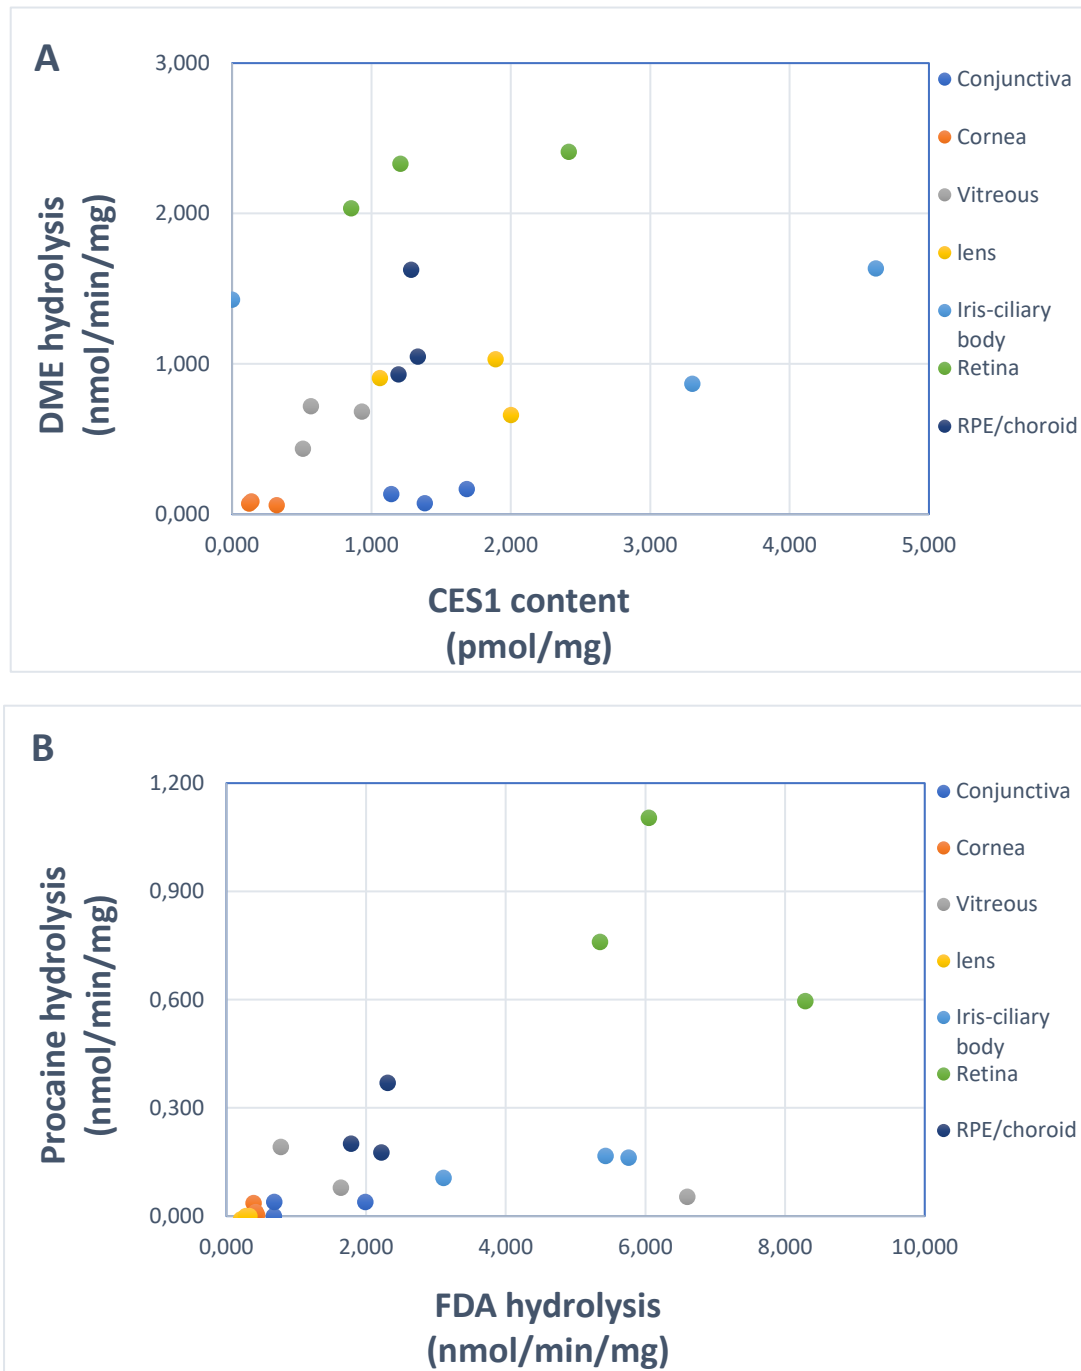

**Correlation between the human CES1 content and hydrolysis activities.** Correlation between the CES1 content and DME hydrolysis (**A**) and between fluorescein diacetate (FDA) and procaine hydrolysis (**B**) in human ocular tissues are shown. Individual pool, each as a data point is shown, and each tissue is represented with a different colour.
